# Supplementary material for: Engineering Human Mesenchymal Bodies in a Novel 3D-Printed Microchannel Bioreactor for Extracellular Vesicle Biogenesis
Source: MDPI journal article supplement (doi:10.3390/bioengineering9120795), 2022-12-13
Supplement: s1 [file s1]

# Engineering Human Mesenchymal Bodies in a Novel 3D-Printed Microchannel Bioreactor for Extracellular Vesicle Biogenesis

Richard Jeske <sup>1</sup>, Xingchi Chen <sup>1,2</sup>, Logan Mulderrig <sup>1,3</sup>, Chang Liu <sup>1</sup>, Wenhao Cheng <sup>1</sup>, Olivia Z. Zeng <sup>1</sup>, Changchun Zeng <sup>2,4</sup>, Jingjiao Guan <sup>1</sup>, Daniel Hallinan <sup>1</sup>, Xuegang Yuan <sup>1,5,\*</sup> and Yan Li <sup>1,\*</sup>

<sup>1</sup> Department of Chemical and Biomedical Engineering, Florida A&M University (FAMU)-FSU College of Engineering, Florida State University, Tallahassee, FL, 32310, USA

<sup>2</sup> High Performance Materials Institute, Florida State University, Tallahassee, FL, 32310, USA

<sup>3</sup> Aero-Propulsion, Mechatronics and Energy Center, FAMU-FSU College of Engineering, Tallahassee, FL, 32310, USA

<sup>4</sup> Department of Industrial and Manufacturing Engineering, FAMU-FSU College of Engineering, Florida State University, Tallahassee, FL, 32310, USA

<sup>5</sup> Department of Pathology and Laboratory Medicine, David Geffen School of Medicine, University of California-Los Angeles (UCLA), Los Angeles, CA, 90095, USA

\* Correspondence: yuanxg1989@g.ucla.edu (X.Y.); yli4@fsu.edu (Y.L.); Tel.: +850-410-6320 (Y.L.); Fax: +850-410-6150 (Y.L.)

## Supplementary

**Citation:** Jeske, R.; Chen, X.; Mulderrig, L.; Liu, C.; Cheng, W.; Zeng, O.Z.; Zeng, C.; Guan, J.; Hallinan, D.; Yuan, X.; et al. Engineering Human Mesenchymal Bodies in a Novel 3D-Printed Microchannel Bioreactor for Extracellular Vesicle Biogenesis. *Bioengineering* **2022**, *9*, x. <https://doi.org/10.3390/xxxxx>  
Academic Editor(s): Cornelia Kasper, Dominik Egger, Fedor Senatov, Michael Raghunath, Farhad Chariyev-Prinz

Received: 28 September 2022

Accepted: 9 December 2022

Published: date

**Publisher's Note:** MDPI stays neutral with regard to jurisdictional claims in published maps and institutional affiliations.

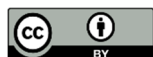

**Copyright:** © 2022 by the authors. Submitted for possible open access publication under the terms and conditions of the Creative Commons Attribution (CC BY) license (<https://creativecommons.org/licenses/by/4.0/>).

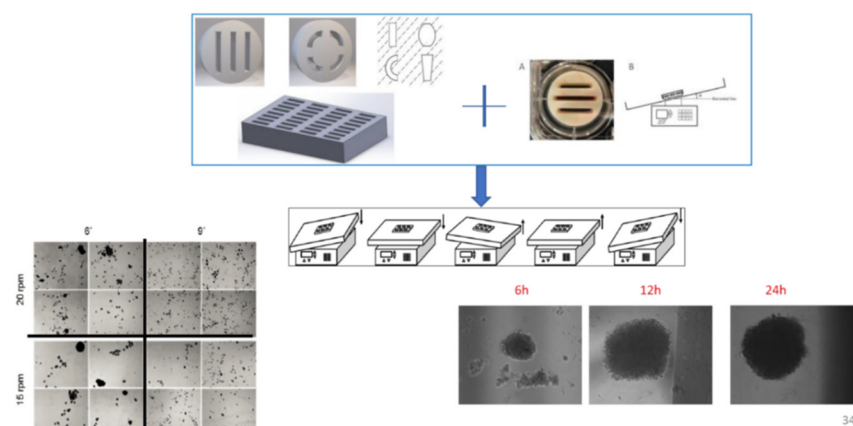

**Figure S1.** Wave motion bioreactor for hMSC aggregate formation. From reference: [1, 2].

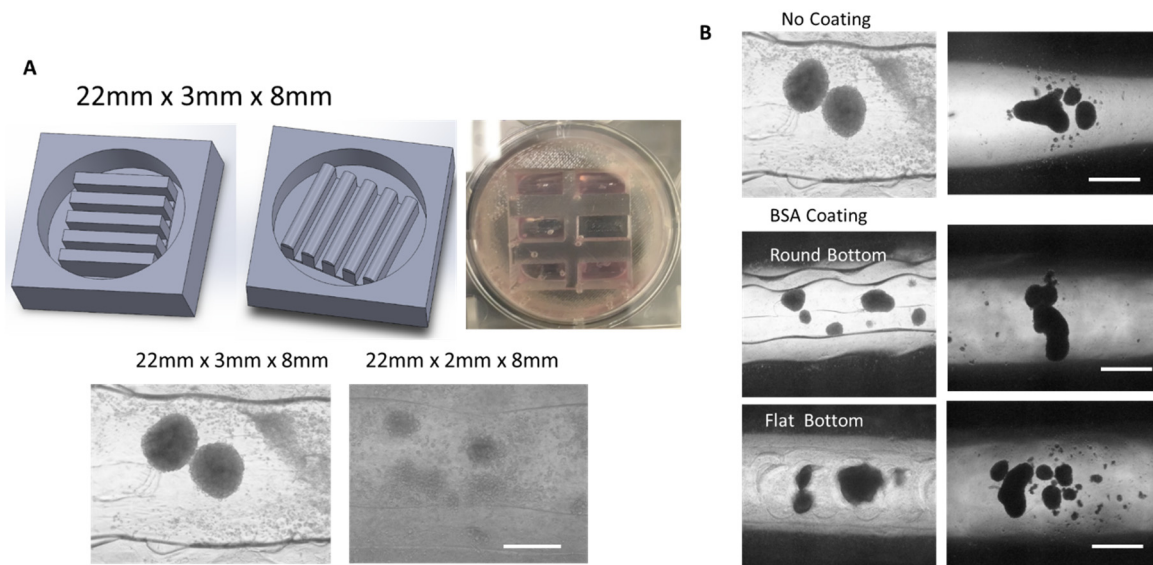

**Figure S2.** Effect of coating on microchannel on aggregate formation. **(A)** The microchannel dimension and the existence of aggregate adhesion in the channel; **(B)** The effect of bovine serum albumin (BSA) coating in the microchannel with round bottom and the flat bottom. Scale bar: 200  $\mu$ m.

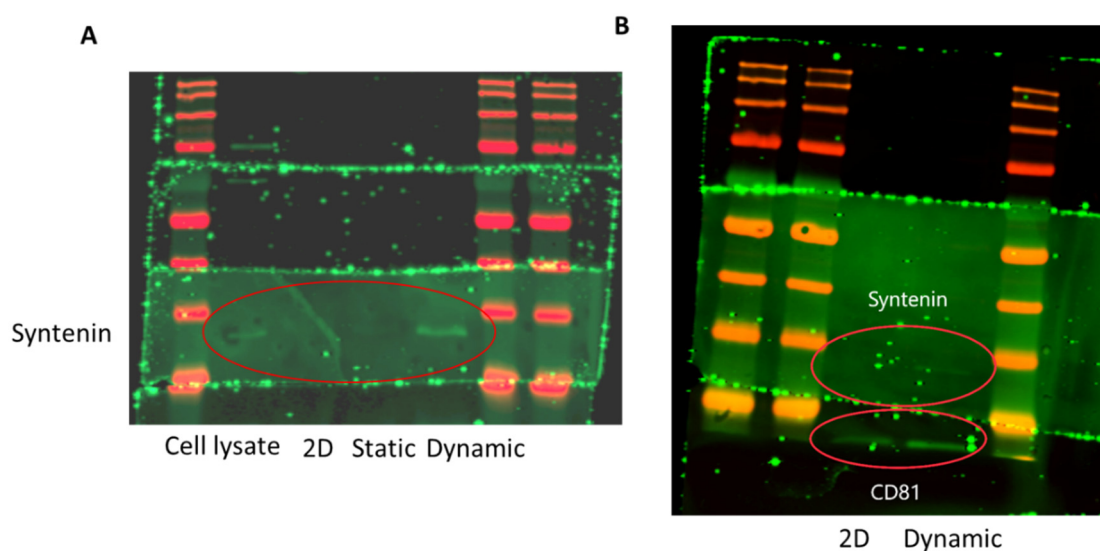

**Figure S3.** Western blot for exosomal markers for the isolated EVs. **(A)** and **(B)** are two different runs for different samples.

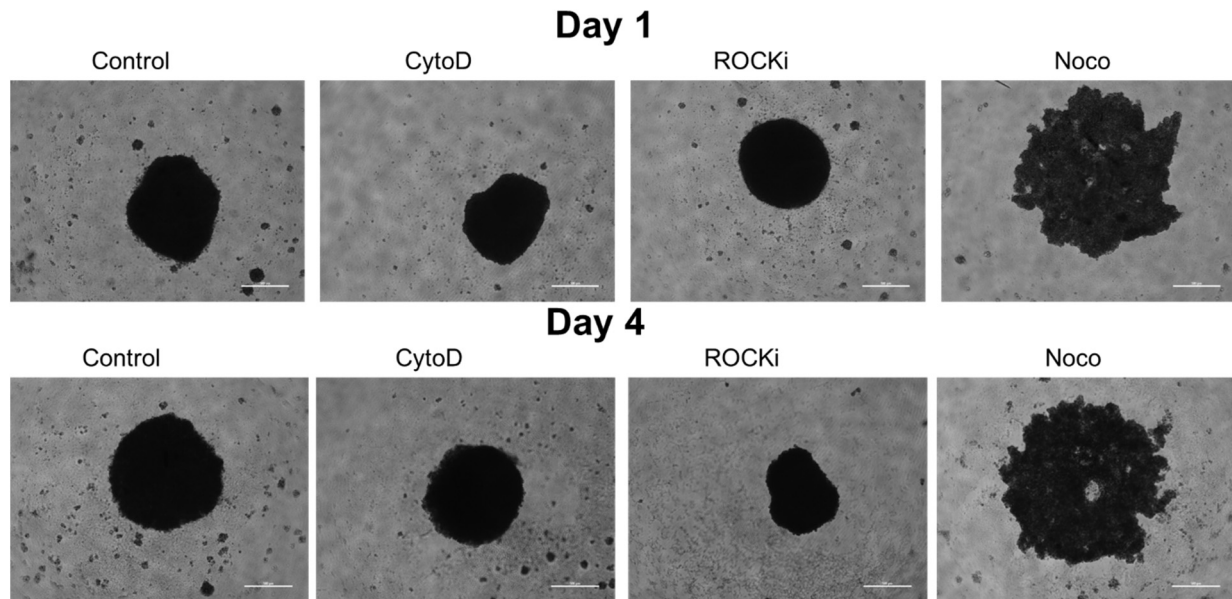

**Figure S4.** hMSC aggregation affected by cytoskeleton organization. Different inhibitors were added to the hMSCs (seeded at 5000 cells per well of low attachment 96-well plate) at day 0. Images were taken at day 1 and 4. Cytochalasin D (cytoD), Y-27632 (ROCKi), and nocodazole (Noco) were added into culture media at final concentrations of 0.2  $\mu$ M, 10  $\mu$ M, and 1.0  $\mu$ M, respectively. Scale bar: 100  $\mu$ m.

**Table S1.** Donor information of bone marrow derived hMSCs.

| ID    | Years | BMI | Race      | Sex | Note   |
|-------|-------|-----|-----------|-----|--------|
| 7051R | 33 yo | NA  | caucasian | F   | Tulane |
| 7052R | 20 yo | NA  | caucasian | M   | Tulane |
| 7038  | 30 yo | NA  | caucasian | F   | Tulane |

**Table S2.** Primer information for RT-qPCR analysis.

| Primer Number | Gene Name    | Primer Name in Database | Primer Sequence (5'-3') |
|---------------|--------------|-------------------------|-------------------------|
|               | ACTB         | Bactin F                | GTACTCCGTGTGGATCGGCG    |
|               |              | Bactin R                | AAGCATTTCGCGTGGACGATGG  |
|               | GAPDH        | GAPDH-F                 | TCAGTCCACCCAGAAGACTG    |
|               |              | GAPDH-R                 | GGATGACCTTGCCCACAGC     |
| 1             | PDK1         | PDK1-F1                 | AAACAGGGGAGCTTTGTCTGG   |
|               |              | PDK1-R1                 | CTGCCATTACATCCCTCTA     |
| 2             | HK2          | HK2 F1                  | TGGTGTAGCTCCTCTGCTGCT   |
|               |              | HK2 R1                  | TGTGGGCACCCTTTAGTGAAC   |
| 3             | PKM2         | PKM2-F1                 | AAAAATGGATGCCAGAGGAC    |
|               |              | PKM2-R1                 | GAGTCGGCTTCAATGGAACAA   |
| 4             | LDHA         | LDHA-F1                 | CCTTGAGCCAGGTGGATGTTT   |
|               |              | LDHA-R1                 | CACTGGATCCCAGGATGTGAC   |
| 5             | TFEB         | TFEB F1                 | CCTGGTGGAGATTCCCTGTCT   |
|               |              | TFEB R1                 | CAGGACCAGTTGCCTCAGATG   |
| 6             | BECN1        | BECN1 F1                | ACTGTGTTGCTGCTCCATGCT   |
|               |              | BECN1 R1                | AACGGCAGCTCCTTAGATTGT   |
| 7             | LAMP1        | LAMP1 F1                | TCACACGTAGGACGCATGAAG   |
|               |              | LAMP1 R1                | GAAGCGCTCCAGACACTCATC   |
| 8             | PRKAA1(AMPK) | PRKAA1 F                | GTGTGTCAAGGTTGCAACAGAA  |
|               |              | PRKAA1 R                | ATTGCAATTGCCTCCCTTACC   |
| 9             | ATG5         | ATG5 F                  | CCAAGCCTCTGGGATTTTACC   |
|               |              | ATG5 R                  | GCGTACTCAAATGGGTCAACA   |
| 10            | ATG16LI-1    | ATG16LI-F1              | ATCTTCCGTTTCAGGGGTTG    |

|    |                    |             |                           |
|----|--------------------|-------------|---------------------------|
|    |                    | ATG16L1-R1  | GTTTCGCACACCCAATGAACT     |
| 11 | SMPD2-1            | SMPD2-F1    | GCCTGGGAGACTTTCTGAACC     |
|    |                    | SMPD2-R1    | AAGTGGTGTGCAGCTGGGTAG     |
| 12 | SMPD3-1            | SMPD3-F1    | TTAAGAGACTCCAGGGCTGCTC    |
|    |                    | SMPD3-R1    | CGGGGATTGTCAAAAACAGTC     |
| 13 | SRSF5(hrs)-1       | SRSF5-F1    | CTTCTCGGATCGAGGCTTCTT     |
|    |                    | SRSF5-R1    | TCGAATCAACTGCGCTCATTA     |
| 14 | TSG101             | TSG101 F    | CACCTGGTGGTCCATATCCTG     |
|    |                    | TSG101 R    | GATGGTGTCTCGCTGATTGT      |
| 15 | STAM1              | STAM1-F1    | CACTGGATTTTTGGGTTGCTC     |
|    |                    | STAM1-R1    | GTGGAAAACATTTTTTCGCATGA   |
| 16 | PDCD61P (ALIX)     | PDCD61P F   | TAAGTGCATCTGAGGGCCAAA     |
|    |                    | PDCD61P R   | GGGGCCTCCTTTCCTAGTTTC     |
|    | PDCD61Pi4 (ALIX14) | PDCD61Pi4 F | TTGGCTAATCAGGCTGCAGAT     |
|    |                    | PDCD61Pi4 R | TCACATGCAAAGTAA-GCAAGTGT  |
| 17 | MITF-1             | MITF-F1     | GAATTGGTGATGGGTGATGGA     |
|    |                    | MITF-R1     | TGCATGGGAAGTATGCAGTTG     |
| 18 | RAB27A             | RAB27A F    | GCATGTTTCAGTTTTCAA-GAACCA |
|    |                    | RAB27A R    | AAAGGTGGCTTTTGTGTGTGC     |
| 19 | RAB27B             | RAB27B F    | TCCATGAAGCTGCTTGTCTCA     |
|    |                    | RAB27B R    | GTTGGGTCTCCACCCAGAAAT     |
| 20 | RAB31              | RAB31-F1    | TCAAGGACTTTGGCATGTGGT     |
|    |                    | RAB31-R1    | TCACCATTCAACTTGCCATGA     |
| 21 | RAB7A              | RAB7A-F1    | TGCTCCCTTCCTAGGATCTGC     |
|    |                    | RAB7A-R1    | CAGAAGAACTCAGCCCACACC     |

**Table S3.** Antibody information.

| Primary Antibody    | Origin/ Isotype              | Supplier/Cat#                       | Dilution              |
|---------------------|------------------------------|-------------------------------------|-----------------------|
| CD81                | Rabbit IgG                   | Cell Signaling Technologies, #56039 | Western blot: 1:1000  |
| Syntenin-1          | mouse monoclonal IgG1        | SANTA, CRUZ/sc-100336               | Western blot: 1:1000  |
| Secondary Anti-body | Origin/ Isotype              | Supplier/ Cat#                      | Dilution              |
| IRDye® 800CW        | Goat anti-Rabbit IgG (H + L) | LI-COR/ 926-32211                   | Western blot: 1:5,000 |

## References:

- Tsai, A.C.; Liu, Y.; Yuan, X.; Chella, R.; Ma, T. Aggregation kinetics of human mesenchymal stem cells under wave motion. *Biotechnol. J.* **2017**, *12*, 1600448.
- Yuan, X.; Tsai, A.C.; Farrance, I.; Rowley, J.; Ma, T. Aggregation of Culture Expanded Human Mesenchymal Stem Cells in Microcarrier-based Bioreactor. *Biochem Eng J.* **2018**, *131*, 39–46.
